# Supplementary material for: Risk Prediction Models for Patients with Head and Neck Cancer among the Taiwanese Population
Source: MDPI journal article supplement (doi:10.3390/cancers14215338), 2022-10-29
Supplement: s1 [file s1]

Table S1 Clinicopathological characteristics of head and neck cancer patients

| Characteristic      | All  |       | Oral cavity |       | Oropharyngeal |       | Hypopharyngeal |       | P value |
|---------------------|------|-------|-------------|-------|---------------|-------|----------------|-------|---------|
|                     | N    | %     | N           | %     | N             | %     | N              | %     |         |
| Pathologic t status |      |       |             |       |               |       |                |       | <0.001  |
| T1                  | 612  | 20.67 | 576         | 22.17 | 25            | 13.51 | 11             | 6.18  |         |
| T2                  | 867  | 29.28 | 799         | 30.75 | 47            | 25.41 | 21             | 11.80 |         |
| T3                  | 295  | 9.96  | 241         | 9.28  | 26            | 14.05 | 28             | 15.73 |         |
| T4                  | 841  | 28.40 | 702         | 27.02 | 57            | 30.81 | 82             | 46.07 |         |
| Unknown             | 346  | 11.69 | 280         | 10.78 | 30            | 16.22 | 36             | 20.22 |         |
| Pathologic n status |      |       |             |       |               |       |                |       | <0.001  |
| No                  | 1572 | 53.09 | 1481        | 57.01 | 52            | 28.11 | 39             | 21.91 |         |
| N1                  | 343  | 11.58 | 295         | 11.35 | 26            | 14.05 | 22             | 12.36 |         |
| N2                  | 649  | 21.92 | 518         | 19.94 | 64            | 34.59 | 67             | 37.64 |         |
| N3                  | 31   | 1.05  | 7           | 0.27  | 11            | 5.95  | 13             | 7.30  |         |
| Unknown             | 366  | 12.36 | 297         | 11.43 | 32            | 17.30 | 37             | 20.79 |         |
| Pathologic stage    |      |       |             |       |               |       |                |       | <0.001  |
| I                   | 506  | 17.09 | 489         | 18.82 | 14            | 7.57  | 3              | 1.69  |         |
| II                  | 524  | 17.70 | 501         | 19.28 | 19            | 10.27 | 4              | 2.25  |         |
| III                 | 382  | 12.90 | 338         | 13.01 | 24            | 12.97 | 20             | 11.24 |         |
| IV                  | 1203 | 40.63 | 990         | 38.11 | 98            | 52.97 | 115            | 64.61 |         |
| Unknown             | 346  | 11.69 | 280         | 10.78 | 30            | 16.22 | 36             | 20.22 |         |
| Differentiation     |      |       |             |       |               |       |                |       | <0.001  |
| Well                | 850  | 28.71 | 823         | 31.68 | 18            | 9.73  | 9              | 5.06  |         |
| Moderate            | 1383 | 46.71 | 1175        | 45.23 | 107           | 57.84 | 101            | 56.74 |         |
| Poor                | 254  | 8.58  | 199         | 7.66  | 23            | 12.43 | 32             | 17.98 |         |
| Unknown             | 474  | 16.01 | 401         | 15.43 | 37            | 20.00 | 36             | 20.22 |         |

Table S2 Original c-index, optimism, adjust performance for risk prediction model

|                    | Original c-index       | Optimism | Adjust performance |
|--------------------|------------------------|----------|--------------------|
| All                |                        |          |                    |
| bootstrapping=100  | 0.9686 (0.9656-0.9716) | 0.00048  | 0.96812            |
| bootstrapping=500  | 0.9686 (0.9656-0.9716) | 0.00048  | 0.96812            |
| bootstrapping=1000 | 0.9686 (0.9656-0.9716) | 0.00042  | 0.96818            |
| Male               |                        |          |                    |
| bootstrapping=100  | 0.9558 (0.9517-0.9600) | 0.00018  | 0.95562            |
| bootstrapping=500  | 0.9558 (0.9517-0.9600) | 0.00050  | 0.95530            |
| bootstrapping=1000 | 0.9558 (0.9517-0.9600) | 0.00060  | 0.95520            |
| Female             |                        |          |                    |
| bootstrapping=100  | 0.9404 (0.9222-0.9587) | 0.00181  | 0.93859            |
| bootstrapping=500  | 0.9404 (0.9222-0.9587) | 0.00321  | 0.93719            |
| bootstrapping=1000 | 0.9404 (0.9222-0.9587) | 0.00337  | 0.93703            |
| Oral               |                        |          |                    |
| bootstrapping=100  | 0.9535 (0.9491-0.9580) | 0.00035  | 0.95315            |
| bootstrapping=500  | 0.9535 (0.9491-0.9580) | 0.00047  | 0.95303            |
| bootstrapping=1000 | 0.9535 (0.9491-0.9580) | 0.00054  | 0.95296            |
| Oropharyngeal      |                        |          |                    |
| bootstrapping=100  | 0.9724 (0.9652-0.9796) | 0.00192  | 0.97048            |
| bootstrapping=500  | 0.9724 (0.9652-0.9796) | 0.00231  | 0.97009            |
| bootstrapping=1000 | 0.9724 (0.9652-0.9796) | 0.00233  | 0.97007            |
| Hypopharyngeal     |                        |          |                    |
| bootstrapping=100  | 0.9819 (0.9754-0.9885) | 0.00163  | 0.98027            |
| bootstrapping=500  | 0.9819 (0.9754-0.9885) | 0.00211  | 0.97979            |
| bootstrapping=1000 | 0.9819 (0.9754-0.9885) | 0.00217  | 0.97973            |

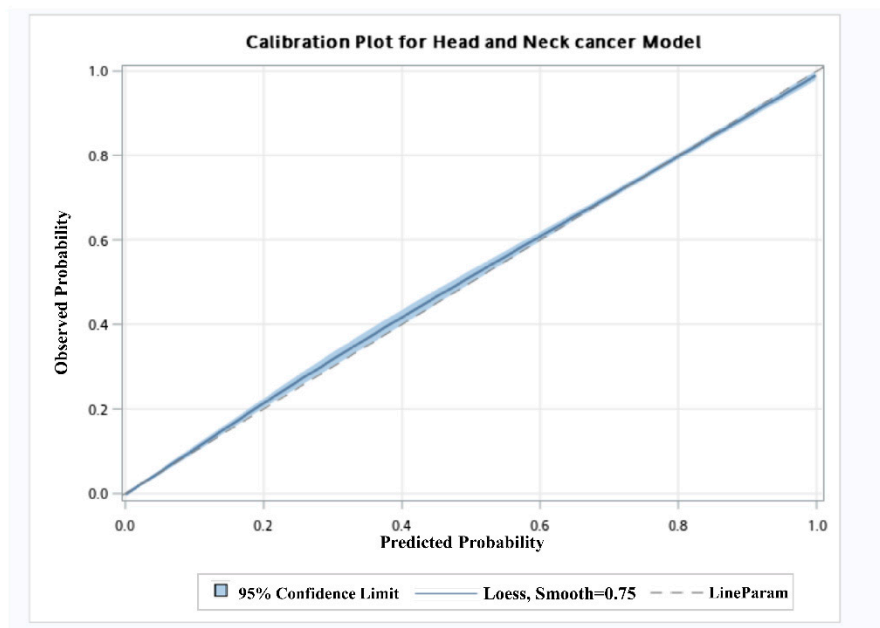

Figure S1 Calibration plot for head and neck cancer prediction model

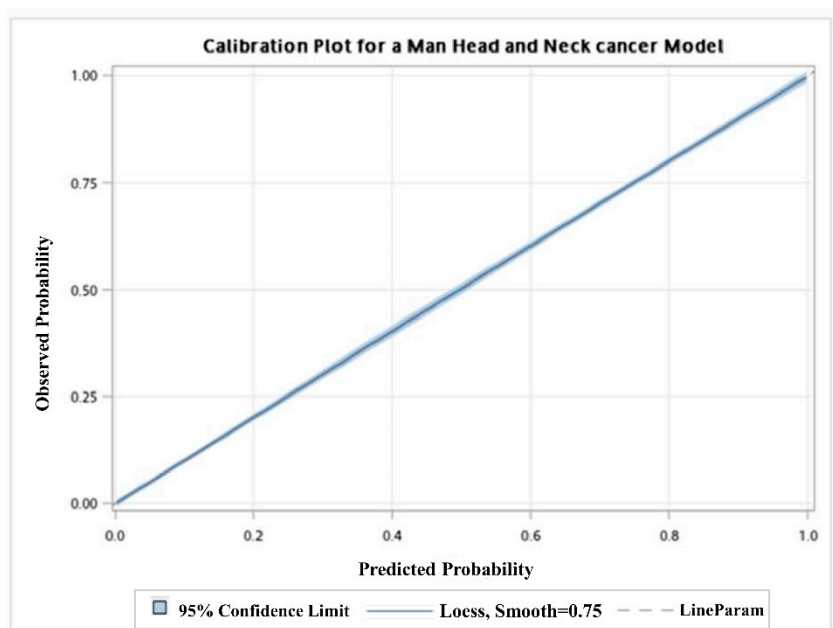

Figure S2 Calibration plot for men head and neck cancer prediction model

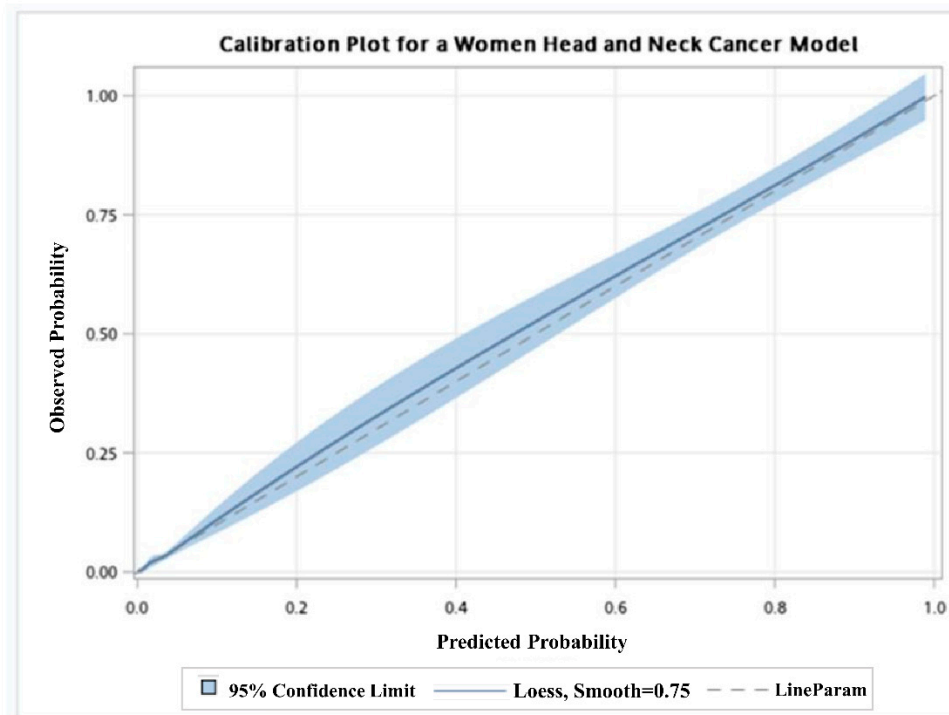

Figure S3 Calibration plot for women head and neck cancer prediction model

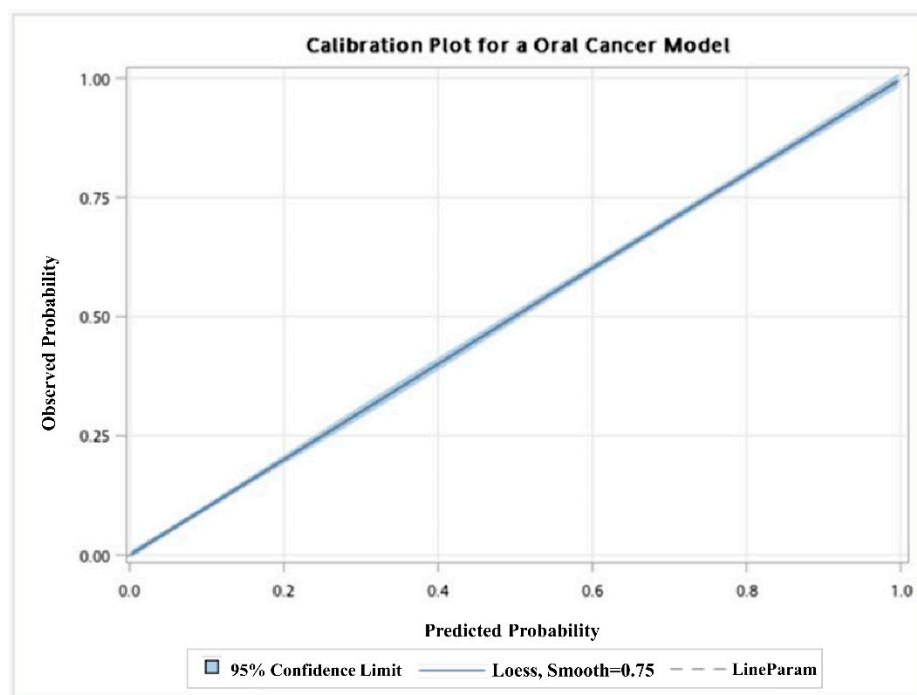

Figure S4 Calibration plot for oral cancer prediction model

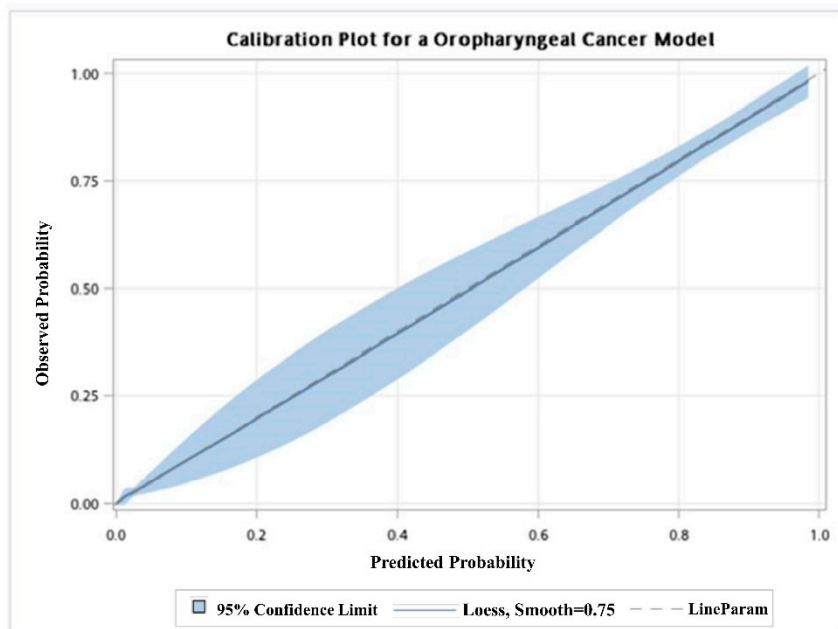

Figure S5 Calibration plot for oropharyngeal cancer prediction model

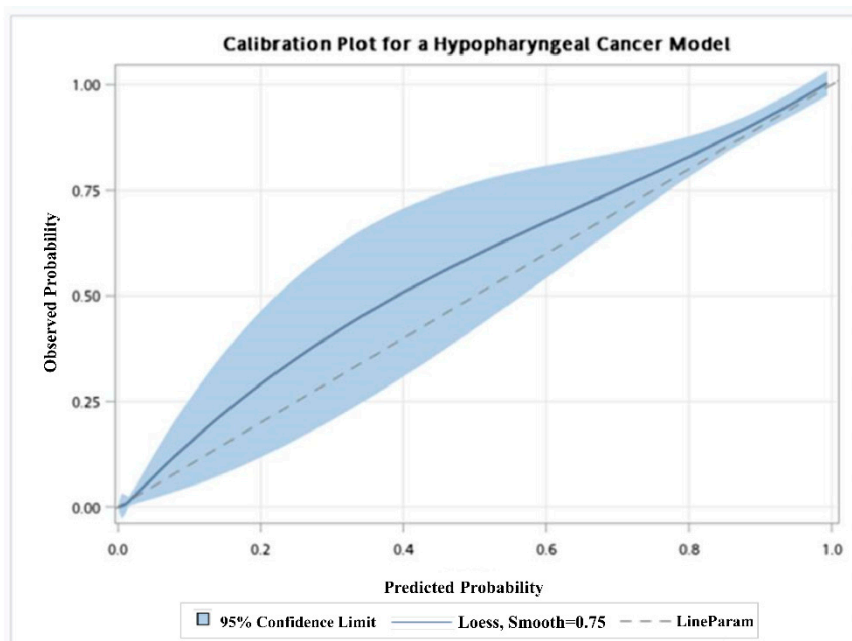

Figure S6 Calibration plot for hypopharyngeal cancer prediction model
